# Supplementary material for: DNA Methylation Signatures Predict Cytogenetic Subtype and Outcome in Pediatric Acute Myeloid Leukemia (AML)
Source: Genes (Basel). 2021 Jun 10;12(6):895. doi: 10.3390/genes12060895 (PMC8229099; doi:10.3390/genes12060895)
Supplement: Supplementary file 1 [file genes-12-00895-s001.zip › SupplementaryMaterial.xlsx]

## Sheet: S1
public_id	Age	Risk.Group04	Protocol	Outcome	Relapse	RFS	Dead	OS	FAB	Original.Subtype	Subtype	Predicted.Subtype	Class.probability	Dataset
AML_110	17		'93	CCR-Therapy off	0	208	0	208	M4	inv(16)/CBFB-MYH11	inv(16)/CBFB-MYH11	inv(16)/CBFB-MYH11	0.999959	Train
AML_051	12		'93	CR-2/3 -Therapy off	1	12	0	210	M4	inv(16)/CBFB-MYH11	inv(16)/CBFB-MYH11	inv(16)/CBFB-MYH11	0.999959	Train
AML_100	15	Standard Risk	'04	Death after relapse(s)	1	8	1	18	M2	t(8;21)/RUNX1-RUNX1T1	t(8;21)/RUNX1-RUNX1T1	t(8;21)/RUNX1-RUNX1T1	0.999982	Train
AML_015	10		'93	Death after relapse(s)	1	28	1	38	M5	other 11q23/MLL	MLL/KMT2A rearranged	MLL/KMT2A rearranged	0.999985	Train
AML_123	6	Standard Risk	'04	CCR-Therapy off	0	155	0	155	M4	inv(16)/CBFB-MYH11	inv(16)/CBFB-MYH11	inv(16)/CBFB-MYH11	0.99996	Train
AML_096	14		'93	CR-2/3 -Therapy off	1	71	0	139	M0	sole+8	sole+8	sole+8	0.999722	Train
AML_049	13		'93	CCR-Therapy off	0	256	0	256	M4	normal	normal	normal	0.999982	Train
AML_009	5		'93	CCR-Therapy off	0	138	0	138	M5	t(9;11)	MLL/KMT2A rearranged	MLL/KMT2A rearranged	0.999985	Train
AML_068	12	Standard Risk	'04	CR-2/3 -Therapy off	1	28	0	147	M4	normal	normal	normal	0.999983	Train
AML_077	4	Standard Risk	'04	Death after relapse(s)	1	10	1	30	M2	t(8;21)/RUNX1-RUNX1T1	t(8;21)/RUNX1-RUNX1T1	t(8;21)/RUNX1-RUNX1T1	0.999981	Train
AML_019	14	Standard Risk	'04	Death after relapse(s)	1	21	1	33	M2	normal	normal	normal	0.999984	Train
AML_058	9	Standard Risk	'04	Death after relapse(s)	1	13	1	18	M2	t(8;21)/RUNX1-RUNX1T1	t(8;21)/RUNX1-RUNX1T1	t(8;21)/RUNX1-RUNX1T1	0.999982	Train
AML_055	16		'93	Induction failure		1	1	1	M2	t(8;21)/RUNX1-RUNX1T1	t(8;21)/RUNX1-RUNX1T1	t(8;21)/RUNX1-RUNX1T1	0.999982	Train
AML_030	3		'04	CCR-Therapy off	0	197	0	197	M5	sole+8	sole+8	sole+8	0.999719	Train
AML_046	10		'04	CCR-Therapy off	0	146	0	146	M3	t(15;17)/PML-RARA	t(15;17)/PML-RARA	t(15;17)/PML-RARA	0.999777	Train
AML_023	14	Standard Risk	'04	Death after relapse(s)	1	5	1	6	M1	3q21q26	3q21q26	3q21q26	0.998188	Train
AML_119	12		'93	CCR-Therapy off	0	206	0	206	M4	inv(16)/CBFB-MYH11	inv(16)/CBFB-MYH11	inv(16)/CBFB-MYH11	0.99996	Train
AML_004	5		'93	Death after relapse(s)	1	13	1	114	M5	t(11;19)	MLL/KMT2A rearranged	MLL/KMT2A rearranged	0.999985	Train
AML_029	15	Standard Risk	'04	Death after relapse(s)	1	7	1	12	M2	t(8;21)/RUNX1-RUNX1T1	t(8;21)/RUNX1-RUNX1T1	t(8;21)/RUNX1-RUNX1T1	0.999982	Train
AML_005	5		other	Death after relapse(s)	1	9	1	12	M2	mono 7	mono 7	mono 7	0.999953	Train
AML_125	3		other	Death after relapse(s)	1	6	1	7	M5	mono 7	mono 7	mono 7	0.999953	Train
AML_081	6	Standard Risk	'04	CR-2/3 -Therapy off	1	16	0	185	M2	t(8;21)/RUNX1-RUNX1T1	t(8;21)/RUNX1-RUNX1T1	t(8;21)/RUNX1-RUNX1T1	0.999982	Train
AML_056	15	Standard Risk	'04	Death after relapse(s)	1	16	1	32	M2	t(8;21)/RUNX1-RUNX1T1	t(8;21)/RUNX1-RUNX1T1	t(8;21)/RUNX1-RUNX1T1	0.999982	Train
AML_008	14		'93	RD-to death		4	1	4	M2	normal	normal	normal	0.999984	Train
AML_113	7	High Risk	'04	CCR-Therapy off	0	140	0	140	M1	normal	normal	normal	0.999984	Train
AML_054	1	Standard Risk	'04	CCR-Therapy off	0	119	0	119	M5	t(9;11)	MLL/KMT2A rearranged	MLL/KMT2A rearranged	0.999985	Train
AML_071	16	High Risk	'04	Death after relapse(s)	1	9	1	11	M5	t(10;11)	MLL/KMT2A rearranged	MLL/KMT2A rearranged	0.999985	Train
AML_018	14	Standard Risk	'04	CCR-Therapy off	0	157	0	157	M2	normal	normal	normal	0.999984	Train
AML_117	12		'93	CCR-Therapy off	0	162	0	162	M4	normal	normal	normal	0.999983	Train
AML_064	5	Standard Risk	'04	CCR-Therapy off	0	118	0	118	M4	inv(16)/CBFB-MYH11	inv(16)/CBFB-MYH11	inv(16)/CBFB-MYH11	0.99996	Train
AML_108	9		'93	CR-2/3 -Therapy off	1	16	0	170	M4	normal	normal	normal	0.999984	Train
AML_116	7		'93	Death in CCR		7	1	7	data missing	normal	normal	normal	0.999983	Train
AML_118	15	Standard Risk	'04	CR-2/3 -Therapy off	1	7	0	97	M2	t(8;21)/RUNX1-RUNX1T1	t(8;21)/RUNX1-RUNX1T1	t(8;21)/RUNX1-RUNX1T1	0.999982	Train
AML_037	14		'93	Death in CCR		6	1	6	M0	normal	normal	normal	0.999984	Train
AML_024	18		other	CCR-Therapy off	0	147	0	147	M2	normal	normal	normal	0.999984	Train
AML_085	10	Standard Risk	'04	CCR-Therapy off	0	93	0	93	M0	t(8;21)/RUNX1-RUNX1T1	t(8;21)/RUNX1-RUNX1T1	t(8;21)/RUNX1-RUNX1T1	0.999982	Train
AML_095	12		'93	CCR-Therapy off	0	191	0	191	M2	inv(16)/CBFB-MYH11	inv(16)/CBFB-MYH11	inv(16)/CBFB-MYH11	0.99996	Train
AML_033	5		'93	Death after relapse(s)	1	10	1	20	M6	normal	normal	normal	0.999984	Train
AML_121	14		'93	CCR-Therapy off	0	153	0	153	M2	t(8;21)/RUNX1-RUNX1T1	t(8;21)/RUNX1-RUNX1T1	t(8;21)/RUNX1-RUNX1T1	0.999982	Train
AML_006	14		'93	CCR-Therapy off	0	211	0	211	M4	inv(16)/CBFB-MYH11	inv(16)/CBFB-MYH11	inv(16)/CBFB-MYH11	0.99996	Train
AML_063	2	High Risk	'04	CCR-Therapy off	0	128	0	128	M5	t(10;11)	MLL/KMT2A rearranged	MLL/KMT2A rearranged	0.999985	Train
AML_028	12		'93	CR-2/3 -Therapy off	1	18	0	198	M2	inv(16)/CBFB-MYH11	inv(16)/CBFB-MYH11	inv(16)/CBFB-MYH11	0.999959	Train
AML_044	3		'93	Death after relapse(s)	1	15	1	21	M1	normal	normal	normal	0.999984	Train
AML_020	0	High Risk	'04	CCR-Therapy off	0	178	0	178	M5	other 11q23/MLL	MLL/KMT2A rearranged	MLL/KMT2A rearranged	0.999985	Train
AML_115	12	Standard Risk	'04	CCR-Therapy off	0	119	0	119	M4	normal	normal	normal	0.999984	Train
AML_007	15		'93	CCR-Therapy off	0	241	0	241	M4	normal	normal	normal	0.999984	Train
AML_089	1		'93	Death in CCR		3	1	3	M5	t(9;11)	MLL/KMT2A rearranged	MLL/KMT2A rearranged	0.999985	Train
AML_041	3		'93	Death after relapse(s)	1	16	1	19	M5	t(11;19)	MLL/KMT2A rearranged	MLL/KMT2A rearranged	0.999983	Train
AML_105	4		'93	Death after relapse(s)	1	11	1	28	M4	normal	normal	normal	0.999983	Train
AML_003	13		'93	CCR-Therapy off	0	83	0	83	M1	normal	normal	normal	0.999984	Train
AML_012	15		'93	CCR-Therapy off	0	120	0	120	M5	other 11q23/MLL	MLL/KMT2A rearranged	MLL/KMT2A rearranged	0.999985	Train
AML_039	14		'93	Death after relapse(s)	1	9	1	13	M2	normal	normal	normal	0.999984	Train
AML_091	2		'93	Death in CCR		1	1	1	M5	other 11q23/MLL	MLL/KMT2A rearranged	MLL/KMT2A rearranged	0.999985	Train
AML_043	3		'93	Death after relapse(s)	1	10	1	12	M2	normal	normal	normal	0.999984	Train
AML_035	3		other	Death after relapse(s)	1	9	1	15	M1	mono 7	mono 7	mono 7	0.999953	Train
AML_073	10	Standard Risk	'04	CR-2/3 -Therapy off	1	36	0	145	M2	t(8;21)/RUNX1-RUNX1T1	t(8;21)/RUNX1-RUNX1T1	t(8;21)/RUNX1-RUNX1T1	0.999982	Train
AML_106	3		'93	CCR-Therapy off	0	160	0	160	M3	t(15;17)/PML-RARA	t(15;17)/PML-RARA	t(15;17)/PML-RARA	0.999777	Train
AML_103	0		'93	CR-2/3 -Therapy off	1	22	0	187	M5	t(9;11)	MLL/KMT2A rearranged	MLL/KMT2A rearranged	0.999985	Train
AML_002	10		'93	Death after relapse(s)	1	8	1	10	M5	t(11;19)	MLL/KMT2A rearranged	MLL/KMT2A rearranged	0.999985	Train
AML_032	1	Standard Risk	'04	CCR-Therapy off	0	172	0	172	M6	normal	normal	normal	0.999982	Train
AML_082	1		'04	No Therapy		0	1	0	data missing	inv(16)/CBFB-MYH11	inv(16)/CBFB-MYH11	inv(16)/CBFB-MYH11	0.999959	Train
AML_047	2		'93	CR-2/3 -Therapy off	1	10	0	215	M4	t(8;21)/RUNX1-RUNX1T1	t(8;21)/RUNX1-RUNX1T1	t(8;21)/RUNX1-RUNX1T1	0.999982	Train
AML_109	2		'93	Death after relapse(s)	1	6	1	7	M0	mono 7	mono 7	mono 7	0.999952	Train
AML_104	9		'93	Death after relapse(s)	1	13	1	84	M1	normal	normal	normal	0.999984	Train
AML_065	15	Standard Risk	'04	Death after relapse(s)	1	9	1	18	M4	normal	normal	normal	0.999984	Train
AML_014	10		'93	Death after relapse(s)	1	17	1	23	M5	t(10;11)	MLL/KMT2A rearranged	MLL/KMT2A rearranged	0.999985	Train
AML_122	1	High Risk	'04	CCR-Therapy off	0	148	0	148	M2	normal	normal	normal	0.99998	Test
AML_031	11	High Risk	'04	CCR-Therapy off	0	175	0	175	M1	sole+8	sole+8	normal	0.999982	Test
AML_090	7		'93	CCR-Therapy off	0	127	0	127	M4	normal	normal	normal	0.999966	Test
AML_022	1	High Risk	'04	CCR-Therapy off	0	149	0	149	M5	t(10;11)	MLL/KMT2A rearranged	MLL/KMT2A rearranged	0.999985	Test
AML_075	16		other	CCR-Therapy off	0		0	138	M3	t(15;17)/PML-RARA	t(15;17)/PML-RARA	t(15;17)/PML-RARA	0.999769	Test
AML_001	12		'93	Death after relapse(s)	1	7	1	12	M2	normal	normal	normal	0.987553	Test
AML_040	12	Standard Risk	'04	CCR-Therapy off	0	156	0	156	M2	t(8;21)/RUNX1-RUNX1T1	t(8;21)/RUNX1-RUNX1T1	t(8;21)/RUNX1-RUNX1T1	0.999981	Test
AML_080	3	Standard Risk	'04	CR-2/3 -Therapy off	1	10	0	180	M2	t(8;21)/RUNX1-RUNX1T1	t(8;21)/RUNX1-RUNX1T1	t(8;21)/RUNX1-RUNX1T1	0.999981	Test
AML_087	1	Standard Risk	'04	CCR-Therapy off	0	118	1	130	M0	mono 7	mono 7	mono 7	0.757961	Test
AML_057	17		'93	Death in CCR		6	1	6	M1	normal	normal	normal	0.999983	Test
AML_102	5	Standard Risk	'04	CCR-Therapy off	0	126	0	126	M5	t(9;11)	MLL/KMT2A rearranged	MLL/KMT2A rearranged	0.920766	Test
AML_052	7	Standard Risk	'04	CCR-Therapy off	0	120	0	120	M4	inv(16)/CBFB-MYH11	inv(16)/CBFB-MYH11	inv(16)/CBFB-MYH11	0.999959	Test
AML_062	1	Standard Risk	'04	Death after relapse(s)	1	5	1	7	M5	t(9;11)	MLL/KMT2A rearranged	MLL/KMT2A rearranged	0.999981	Test
AML_027	1	Standard Risk	'04	CCR-Therapy off	0	173	0	173	M4	inv(16)/CBFB-MYH11	inv(16)/CBFB-MYH11	inv(16)/CBFB-MYH11	0.99852	Test
AML_061	16	Standard Risk	'04	CCR-Therapy off	0	125	0	125	M5	t(9;11)	MLL/KMT2A rearranged	MLL/KMT2A rearranged	0.999978	Test
AML_059	7		other	CCR-Therapy off	0	126	0	126	M3	t(15;17)/PML-RARA	t(15;17)/PML-RARA	t(15;17)/PML-RARA	0.999745	Test
AML_053	9		'93	CCR-Therapy off	0	150	0	150	M2	t(8;21)/RUNX1-RUNX1T1	t(8;21)/RUNX1-RUNX1T1	t(8;21)/RUNX1-RUNX1T1	0.999982	Test
AML_111	11	Standard Risk	'04	CCR-Therapy off	0	131	0	131	M1	t(8;21)/RUNX1-RUNX1T1	t(8;21)/RUNX1-RUNX1T1	t(8;21)/RUNX1-RUNX1T1	0.999981	Test
AML_070	1	High Risk	'04	CCR-Therapy off	0	174	0	174	M5	other 11q23/MLL	MLL/KMT2A rearranged	MLL/KMT2A rearranged	0.999985	Test
AML_120	3	Standard Risk	'04	Induction failure		0	1	0	M5	t(9;11)	MLL/KMT2A rearranged	MLL/KMT2A rearranged	0.999984	Test
AML_017	12	Standard Risk	'04	CCR-Therapy off	0	125	0	125	M5	t(9;11)	MLL/KMT2A rearranged	MLL/KMT2A rearranged	0.999982	Test
AML_112	5	Standard Risk	'04	Death after relapse(s)	1	16	1	27	M5	t(9;11)	MLL/KMT2A rearranged	MLL/KMT2A rearranged	0.999868	Test
AML_069	14	Standard Risk	'04	CCR-Therapy off	0	128	0	128	M5	t(9;11)	MLL/KMT2A rearranged	MLL/KMT2A rearranged	0.997482	Test
AML_042	16	High Risk	'04	Death after relapse(s)	1	11	1	21	M4	t(10;11)	MLL/KMT2A rearranged	MLL/KMT2A rearranged	0.999983	Test
AML_021	13	Standard Risk	'04	CR-2/3 -Therapy off	1	24	0	156	M0	normal	normal	normal	0.934975	Test
AML_013	2		'93	CCR-Therapy off	0	234	0	234	M3	normal	normal	t(15;17)/PML-RARA	0.966739	Test
AML_124	14	High Risk	'04	CCR-Therapy off	0	134	0	134	M2	normal	normal	normal	0.999983	Test
AML_072	10	Standard Risk	'04	CR-2/3 -Therapy off	1	10	0	138	M2	t(8;21)/RUNX1-RUNX1T1	t(8;21)/RUNX1-RUNX1T1	t(8;21)/RUNX1-RUNX1T1	0.999979	Test
AML_036	9	Standard Risk	'04	CCR-Therapy off	0	185	0	185	M2	t(8;21)/RUNX1-RUNX1T1	t(8;21)/RUNX1-RUNX1T1	t(8;21)/RUNX1-RUNX1T1	0.99998	Test
AML_066	3	Standard Risk	'04	CR-2/3 -Therapy off	1	13	0	144	M2	t(8;21)/RUNX1-RUNX1T1	t(8;21)/RUNX1-RUNX1T1	t(8;21)/RUNX1-RUNX1T1	0.999982	Test
AML_038	5	Standard Risk	'04	CCR-Therapy off	0	150	0	150	M4	inv(16)/CBFB-MYH11	inv(16)/CBFB-MYH11	inv(16)/CBFB-MYH11	0.999925	Test
AML_045	5		'93	Death after relapse(s)	1	4	1	9	M2	normal	normal	normal	0.999981	Test
AML_086	6	Standard Risk	'04	CR-2/3 On therapy	1	59	0	166	M2	t(9;11)	MLL/KMT2A rearranged	normal	0.999983	Test
AML_004_r	5		'93	Death after relapse(s)	1	13	1	114	M5		Undefined	normal	0.883489	Extra undefined
AML_010	2		other	CCR-Therapy off	0	189	0	189	M2	other clon abn	Undefined	normal	0.999947	Extra undefined
AML_011	3		other	CCR-Therapy off	0	201	0	201	M7	other clon abn	Undefined	normal	0.999962	Extra undefined
AML_016	2		other	CCR-Therapy off	0	176	0	176	M7	other clon abn	Undefined	normal	0.999964	Extra undefined
AML_019_r	14	Standard Risk	'04	Death after relapse(s)	1	21	1	33	M2		Undefined	normal	0.99996	Extra undefined
AML_025	2		'93	CCR-Therapy off	0	146	0	146	M3	other clon abn	Undefined	MLL/KMT2A rearranged	0.999948	Extra undefined
AML_026	14		'93	CR-2/3 -Therapy off	1	3	0	169	M4	other clon abn	Undefined	mono 7	0.462439	Extra undefined
AML_028_r	12		'93	CR-2/3 -Therapy off	1	18	0	198	M2		Undefined	inv(16)/CBFB-MYH11	0.999928	Extra undefined
AML_033_r	5		'93	Death after relapse(s)	1	10	1	20	M6		Undefined	normal	0.653973	Extra undefined
AML_034	2		other	CCR-Therapy off	0	195	0	195	M7	other clon abn	Undefined	normal	0.999963	Extra undefined
AML_039_r	14		'93	Death after relapse(s)	1	9	1	13	M2		Undefined	normal	0.999932	Extra undefined
AML_044_r	3		'93	Death after relapse(s)	1	15	1	21	M1		Undefined	MLL/KMT2A rearranged	0.996135	Extra undefined
AML_047_r	2		'93	CR-2/3 -Therapy off	1	10	0	215	M4		Undefined	t(8;21)/RUNX1-RUNX1T1	0.999953	Extra undefined
AML_048	1	Standard Risk	'04	CCR-Therapy off	0	136	0	136	M4	other clon abn	Undefined	MLL/KMT2A rearranged	0.999958	Extra undefined
AML_050	2	Standard Risk	'04	CR-2/3 -Therapy off	1	22	0	126	M1	other clon abn	Undefined	normal	0.946399	Extra undefined
AML_060_r	1	Standard Risk	'04	Death after relapse(s)	1	5	1	7	M5		Undefined	MLL/KMT2A rearranged	0.999958	Extra undefined
AML_065_r	15	Standard Risk	'04	Death after relapse(s)	1	9	1	18	M4		Undefined	normal	0.999962	Extra undefined
AML_067_r	13	Standard Risk	'04	Death after relapse(s)	1	8	1	17	M2		Undefined	t(8;21)/RUNX1-RUNX1T1	0.565142	Extra undefined
AML_074	2	Standard Risk	'04	CCR-Therapy off	0	169	0	169	M4	other clon abn	Undefined	normal	0.998379	Extra undefined
AML_076	3		other	CCR-Therapy off	0	164	0	164	M7	other clon abn	Undefined	normal	0.999961	Extra undefined
AML_078	6	Standard Risk	'04	CR-2/3 -Therapy off	1	11	0	163	M2	other clon abn	Undefined	mono 7	0.945241	Extra undefined
AML_079_r	2		'93	CR-2/3 -Therapy off	1	14	0	196	M4		Undefined	normal	0.804656	Extra undefined
AML_083	1		other	CCR-Therapy off	0	178	0	178	M6	other clon abn	Undefined	normal	0.998633	Extra undefined
AML_084	1	Standard Risk	'04	CCR-Therapy off	0	181	0	181	M4	other clon abn	Undefined	normal	0.589044	Extra undefined
AML_029_r	15	Standard Risk	'04	Death after relapse(s)	1	7	1	12	M2		Undefined	t(8;21)/RUNX1-RUNX1T1	0.999953	Extra undefined
AML_088	9	Standard Risk	'04	CCR-Therapy off	0	162	0	162	M5	other clon abn	Undefined	t(8;21)/RUNX1-RUNX1T1	0.999894	Extra undefined
AML_092	0		'93	CCR-Therapy off	0	126	0	126	M5	other clon abn	Undefined	MLL/KMT2A rearranged	0.999958	Extra undefined
AML_093	17		'93	Death after relapse(s)	1	12	1	19	M4	other clon abn	Undefined	normal	0.999964	Extra undefined
AML_079	2		'93	CR-2/3 -Therapy off	1	14	0	196	M4	other clon abn	Undefined	normal	0.843815	Extra undefined
AML_094	15		'93	RD to CR/Alive		112	0	112	M1	other clon abn	Undefined	normal	0.999963	Extra undefined
AML_097	1	Standard Risk	'04	Death after relapse(s)	1	3	1	4	M6	other clon abn	Undefined	MLL/KMT2A rearranged	0.998765	Extra undefined
AML_060	1	Standard Risk	'04	Death after relapse(s)	1	5	1	7	M5	other clon abn	Undefined	MLL/KMT2A rearranged	0.999958	Extra undefined
AML_098	2		other	Death after relapse(s)	1	9	1	13	data missing	other clon abn	Undefined	normal	0.999924	Extra undefined
AML_099	15		other	No Therapy		0	1	0	M4	other clon abn	Undefined	MLL/KMT2A rearranged	0.999955	Extra undefined
AML_077_r	4	Standard Risk	'04	Death after relapse(s)	1	10	1	30	M2		Undefined	t(8;21)/RUNX1-RUNX1T1	0.999926	Extra undefined
AML_101	5	Standard Risk	'04	CR-2/3 -Therapy off	1	49	0	161	M1	other clon abn	Undefined	normal	0.999945	Extra undefined
AML_072_r	10	Standard Risk	'04	CR-2/3 -Therapy off	1	10	0	138	M2		Undefined	t(8;21)/RUNX1-RUNX1T1	0.999951	Extra undefined
AML_104_r	9		'93	Death after relapse(s)	1	13	1	84	M1		Undefined	normal	0.999958	Extra undefined
AML_107	8		'93	CCR-Therapy off	0	201	0	201	data missing	no result	Undefined	normal	0.999964	Extra undefined
AML_001_r	12		'93	Death after relapse(s)	1	7	1	12	M2		Undefined	normal	0.914731	Extra undefined
AML_114_r	9		'93	Death after relapse(s)	1	11	1	13	M4		Undefined	MLL/KMT2A rearranged	0.981258	Extra undefined
AML_043_r	3		'93	Death after relapse(s)	1	10	1	12	M2		Undefined	normal	0.999963	Extra undefined
AML_093_r	17		'93	Death after relapse(s)	1	12	1	19	M4		Undefined	normal	0.999862	Extra undefined

## Sheet: S2
BestModel	PairModel	p-value	Corrected p-value
NeuralNetwork	NearestCentroid	0.285049	0.3125
NeuralNetwork	KNeighborsClassifier	0.179712	0.239617
NeuralNetwork	SVC	0.10247	0.204941
NeuralNetwork	GaussianProcessClassifier	0.0625	0.166667
NeuralNetwork	DecisionTreeClassifier	0.0625	0.166667
NeuralNetwork	RandomForestClassifier	0.140773	0.225236
NeuralNetwork	AdaBoostClassifier	0.3125	0.3125
NeuralNetwork	GaussianNB	0.0625	0.166667

## Sheet: S3
public_id	subtype relapses	predicted class	subtype diagnosis
AML_004_r	No result	normal	MLL rearranged
AML_019_r	No result	normal	normal
AML_028_r	No result	inv(16)	inv(16)
AML_033_r	No result	MLL rearranged	normal
AML_039_r	No result	normal	normal
AML_044_r	No result	MLL rearranged	normal
AML_047_r	No result	t(8;21)	t(8;21)
AML_065_r	No result	normal	normal
AML_029_r	No result	t(8;21)	t(8;21)
AML_077_r	No result	t(8;21)	t(8;21)
AML_072_r	No result	t(8;21)	t(8;21)
AML_104_r	No result	normal	normal
AML_001_r	No result	normal	normal
AML_043_r	No result	normal	normal

## Sheet: S4
Mutational Status CEBPA	Group A	Group B	Total
WT	9	16	25
Any CEBPA mutation (single/ double)	0	8	8
Total	9	24	33
Proportion with mutation	0	0.333333	0.242424
Not tested	9	3	12
Fisher's exact p-value			0.07
Mutational Status WT1	Group A	Group B	Total
WT	9	16	25
WT1 mutation	0	8	8
Total	9	24	33
Proportion with mutation	0	0.333333	0.242424
Not tested	9	3	12
Fisher's exact p-value			0.07
Mutational Status NPM1	Group A	Group B	Total
WT	8	22	30
NPM1 mutation	1	2	3
Total	9	24	33
Proportion with mutation	0.111111	0.0833333	0.0909091
Not tested	9	3	12
Fisher's exact p-value			1
Mutational Status FLT3	Group A	Group B	Total
WT	15	18	33
Any FLT3 mutation (FLT3-IDT, FLT3-AML)	2	7	9
Total	17	25	42
Proportion with mutation	0.117647	0.28	0.214286
Not tested	1	2	3
Fisher's exact p-value			0.27
Mutational Status any mutation	Group A	Group B	Total
WT	14	8	22
Any mutation	3	17	20
Total	17	25	42
Proportion with mutation	0.176471	0.68	0.47619
Not tested	1	2	3
Fisher's exact p-value			0.002
Age	Group A	Group B
t-test p-value			3.97e-05
Sex	Group A	Group B	Total
Male	12	16	28
Female	6	11	17
Total	18	27	45
Fisher's exact p-value			0.76
Clinical Outcome: Relapse	Group A	Group B	Total
TRUE	6	13	19
FALSE	12	9	21
Total	18	22	40
NA	0	5	5
Fisher's exact p-value			0.12
Clinical Outcome: Death	Group A	Group B	Total
TRUE	3	13	16
FALSE	15	14	29
Total	18	27	45
Fisher's exact p-value			0.06

## Sheet: S5
Subtype	CpG ID	Gene	Mean B-value subtype	Mean B-value other	Median B-value subtype	Median B-value other	Std B-value subtype	Std B-value other	p-value	Adjusted p-value
normal	cg15139588	ZNF793	0.216867	0.464783	0.054	0.425	0.273001	0.334755	0.00021444	0.00162077
normal	cg15605858	APBA2	0.443967	0.222043	0.3755	0.147	0.321264	0.201276	0.000875769	0.00437884
normal	cg02390319	PRDM16	0.419733	0.0907536	0.2515	0.026	0.397723	0.17005	0.00213961	0.00824461
normal	cg02571816	PPP1R14A	0.5031	0.320261	0.515	0.223	0.33659	0.303788	0.0112917	0.0300803
normal	cg03745383	ACCN1	0.521267	0.640898	0.5575	0.635	0.294348	0.257976	0.021415	0.0491915
MLL rearranged	cg14003035	KIAA1755	0.1708	0.6	0.065	0.6955	0.223569	0.291847	2.42554e-08	3.42739e-07
MLL rearranged	cg27340480	PLAUR	0.4334	0.720243	0.432	0.7725	0.220746	0.206282	4.57775e-07	4.021e-06
MLL rearranged	cg05803631	PER3	0.10976	0.375703	0.047	0.237	0.190401	0.325569	2.1142e-06	1.30221e-05
MLL rearranged	cg09341793	ASB2	0.2454	0.630932	0.127	0.736	0.290966	0.314028	2.43033e-06	1.44928e-05
MLL rearranged	cg26827876	KLK4	0.26752	0.481946	0.22	0.488	0.136043	0.21407	4.89701e-06	2.64154e-05
MLL rearranged	cg18322569	BARHL2	0.27952	0.62677	0.146	0.754	0.286186	0.318399	1.70755e-05	7.37481e-05
MLL rearranged	cg23049458	L1TD1	0.28732	0.571453	0.115	0.6095	0.302548	0.317492	0.0001041	0.000354266
MLL rearranged	cg10428938	ARPC1B	0.47368	0.726243	0.417	0.7865	0.28183	0.207476	0.000177101	0.000556184
MLL rearranged	cg17256364	ST8SIA6	0.26488	0.455959	0.17	0.4605	0.188151	0.246123	0.000236626	0.000700714
MLL rearranged	cg11174855	NKX6-2	0.31908	0.56977	0.234	0.649	0.289521	0.308373	0.000853281	0.00206567
MLL rearranged	cg19554389	WNT5A	0.28572	0.529554	0.112	0.613	0.284106	0.306668	0.000901334	0.00216587
MLL rearranged	cg12128839	HOXA5	0.45024	0.650716	0.416	0.7415	0.293883	0.312409	0.00108962	0.00253879
MLL rearranged	cg06744585	NFIX	0.6344	0.868743	0.688	0.965	0.330292	0.200269	0.00117832	0.00272566
MLL rearranged	cg25241559	SNED1	0.64412	0.828973	0.901	0.9545	0.344631	0.250891	0.00127682	0.00291303
MLL rearranged	cg12694372	TNXB	0.29736	0.508176	0.162	0.527	0.282776	0.310667	0.00138534	0.00311044
MLL rearranged	cg06013117	MSX2	0.63102	0.423405	0.701	0.317	0.236526	0.296372	0.00220252	0.00474053
MLL rearranged	cg08214808	MAPK8IP1	0.35348	0.566459	0.262	0.605	0.301054	0.327989	0.00374788	0.00756691
MLL rearranged	cg09991306	SNED1	0.57348	0.820432	0.647	0.9085	0.369403	0.221711	0.00417161	0.00829219
MLL rearranged	cg18477674	BNIP3	0.63704	0.758487	0.699	0.9605	0.327074	0.308885	0.00485748	0.00940848
MLL rearranged	cg19108881	CASR	0.33298	0.523068	0.223	0.483	0.281625	0.326978	0.00612562	0.0114745
MLL rearranged	cg24384918	HECW1	0.37088	0.540108	0.237	0.595	0.267518	0.257088	0.00641055	0.0119223
MLL rearranged	cg25307665	HOXA5	0.57528	0.720568	0.481	0.938	0.349971	0.32403	0.00647722	0.0120205
MLL rearranged	cg19596110	PCDHA1;PCDHA2;PCDHA3;PCDHA4;PCDHA5;PCDHA6;PCDHA7;PCDHA8	0.3956	0.526892	0.487	0.58	0.216543	0.247092	0.00678294	0.0124722
MLL rearranged	cg10923662	TNXB	0.41084	0.590554	0.352	0.6725	0.308786	0.318183	0.00685993	0.0125959
MLL rearranged	cg00396667	PITX1	0.33084	0.496595	0.356	0.4905	0.276838	0.308917	0.00701549	0.0128453
MLL rearranged	cg07857792	KCNN1	0.10076	0.205189	0.045	0.097	0.125221	0.218439	0.00708793	0.0129518
MLL rearranged	cg16834823	TNXB	0.49332	0.647027	0.548	0.7315	0.299198	0.26626	0.00884839	0.0156929
MLL rearranged	cg20168964	TMEM132D	0.49664	0.610324	0.463	0.575	0.261715	0.210884	0.0119358	0.0204975
MLL rearranged	cg20276677	NPSR1	0.57844	0.71673	0.558	0.8135	0.2488	0.226004	0.0119358	0.0204975
MLL rearranged	cg16709904	LOC732275	0.5755	0.684703	0.621	0.7255	0.221968	0.25716	0.0132473	0.0224239
MLL rearranged	cg02413092	NOM1	0.49232	0.632892	0.579	0.691	0.297036	0.274455	0.0143824	0.0240947
MLL rearranged	cg16440561	SPEG	0.24776	0.387662	0.102	0.243	0.247976	0.328965	0.0152835	0.0255051
MLL rearranged	cg01992382	TNXB	0.4262	0.561108	0.447	0.61	0.285627	0.284829	0.022672	0.0358145
MLL rearranged	cg09164898	EDARADD	0.30732	0.391027	0.2	0.4115	0.250843	0.22205	0.0254031	0.0393144
MLL rearranged	cg26286839	THBS4	0.70664	0.566068	0.8	0.593	0.280724	0.306942	0.0278838	0.042848
MLL rearranged	cg06417478	HOOK2	0.48428	0.378851	0.513	0.482	0.275685	0.317181	0.028138	0.0430877
MLL rearranged	cg09969277	LOC254559	0.294	0.173919	0.205	0.0525	0.29207	0.208605	0.0288955	0.0440377
MLL rearranged	cg25204852	DCC	0.55592	0.664662	0.632	0.6615	0.268874	0.257955	0.0302866	0.045782
mono 7	cg25059899	BCL2	0.8448	0.251755	0.861	0.192	0.0602387	0.202106	0.000226132	0.0123203
mono 7	cg03562414	ZNF577	0.9142	0.502314	0.929	0.68625	0.0307197	0.33631	0.000541668	0.0123203
mono 7	cg24794228	ZNF577	0.8994	0.365213	0.948	0.473	0.0923082	0.321309	0.000456726	0.0123203
mono 7	cg21790626	ZNF154	0.0204	0.398723	0.02	0.3595	0.00320936	0.322549	0.000469992	0.0123203
mono 7	cg07971820	ARRB2	0.8632	0.436862	0.859	0.3555	0.0379302	0.247815	0.000512333	0.0123203
mono 7	cg25139649	SKI	0.8624	0.24066	0.861	0.171	0.0566551	0.201198	0.000125826	0.0123203
mono 7	cg11269599	ZNF577	0.8988	0.355404	0.935	0.2505	0.0663754	0.315278	0.000342271	0.0123203
mono 7	cg27049766	ZNF154	0.029	0.434511	0.028	0.405	0.00494975	0.304833	0.000332505	0.0123203
mono 7	cg06373940	ERCC3	0.8102	0.31967	0.888	0.295	0.1369	0.195523	0.000226095	0.0123203
mono 7	cg09929238	RPTOR	0.8412	0.252787	0.945	0.1545	0.149979	0.257991	0.000457095	0.0123203
mono 7	cg04120272	FBXO47	0.8488	0.336926	0.874	0.128	0.0950984	0.311692	0.000716452	0.0134984
mono 7	cg10635122	ZNF577	0.9164	0.424904	0.927	0.5275	0.0243475	0.339136	0.000778111	0.01367
mono 7	cg02286380	ARRB2	0.8736	0.562819	0.868	0.5055	0.0659492	0.204573	0.001727	0.0175398
mono 7	cg00084338	DLL1	0.8588	0.456957	0.917	0.466	0.1472	0.307944	0.00264862	0.021124
mono 7	cg26227225	C1orf86;LOC100128003	0.7948	0.38034	0.767	0.271	0.173621	0.31409	0.00540555	0.0315207
mono 7	cg26465391	ZNF154	0.1818	0.479766	0.131	0.4545	0.127166	0.266791	0.00553202	0.0315436
mono 7	cg22549041	CYP1A1	0.8184	0.462239	0.887	0.416	0.144044	0.304139	0.00740959	0.0356758
mono 7	cg24578857	PLD6	0.9498	0.741926	0.976	0.8845	0.0466926	0.278428	0.00844711	0.0388194
mono 7	cg19093370	PLD6	0.9396	0.747968	0.968	0.902	0.0531535	0.27059	0.0118727	0.0477847
inv(16)	cg13588403	DPF3	0.171167	0.873655	0.145	0.961	0.130371	0.211155	3.33812e-08	1.12532e-05
inv(16)	cg13134916	IFLTD1	0.784417	0.244471	0.821	0.188	0.103034	0.214911	9.41176e-08	1.14529e-05
inv(16)	cg06636541	BAHCC1	0.830583	0.269184	0.853	0.142	0.107602	0.273443	3.00469e-07	2.44131e-05
inv(16)	cg16987305	LEPR	0.562	0.185759	0.5805	0.045	0.306069	0.226315	4.24047e-05	0.000473001
inv(16)	cg22079161	AFAP1	0.1785	0.482598	0.097	0.469	0.16957	0.280469	0.000182031	0.00130022
inv(16)	cg20101529	PRHOXNB	0.155167	0.463667	0.0625	0.544	0.205339	0.308433	0.000636856	0.0032595
inv(16)	cg19537719	ANK1	0.27925	0.56469	0.195	0.648	0.263564	0.311366	0.00228575	0.00868852
inv(16)	cg13330559	SHISA6	0.127917	0.363115	0.059	0.32	0.146817	0.290319	0.0029792	0.0107284
inv(16)	cg03337482	PRDM16	0.383583	0.589195	0.3455	0.579	0.209065	0.247617	0.00437915	0.0141263
inv(16)	cg05834845	MUC4	0.657	0.788632	0.7385	0.921	0.259232	0.22819	0.00480538	0.0153113
inv(16)	cg20744362	C22orf34	0.791917	0.571	0.947	0.596	0.228553	0.329297	0.00496034	0.0156896
inv(16)	cg23732024	LY96	0.665417	0.422621	0.6375	0.487	0.162079	0.301648	0.00642706	0.0191194
inv(16)	cg26929700	ZNF423	0.417833	0.624023	0.579	0.734	0.3137	0.306463	0.0121752	0.0314668
inv(16)	cg26988138	GNG7	0.0926667	0.244931	0.0595	0.119	0.0816604	0.258567	0.0126916	0.0325536
inv(16)	cg08871608	CNTD2	0.2235	0.370621	0.1595	0.299	0.191201	0.249119	0.0195151	0.0457958
inv(16)	cg04086531	ZNF423	0.451	0.655276	0.6005	0.698	0.327437	0.289619	0.0210909	0.0486137
t(8;21)	cg13375589	SMTNL2	0.215974	0.56375	0.108	0.589	0.214785	0.299311	5.45512e-06	3.96182e-05
t(8;21)	cg13811417	TUSC1	0.772526	0.389125	0.877	0.281	0.227395	0.327321	2.63992e-05	0.000141814
t(8;21)	cg14632696	PDLIM3	0.732421	0.445638	0.826	0.405	0.273234	0.315336	0.000192791	0.000785668
t(8;21)	cg08022717	CYP27C1	0.311789	0.522075	0.31	0.5735	0.172254	0.254832	0.000658771	0.00221354
t(8;21)	cg26514430	PCDHA1;PCDHA10;PCDHA11;PCDHA2;PCDHA3;PCDHA4;PCDHA5;PCDHA6;PCDHA7;PCDHA8;PCDHA9	0.743842	0.562237	0.815	0.583	0.220598	0.223472	0.000841894	0.00274301
t(8;21)	cg07790615	RYR2	0.702	0.432438	0.821	0.3715	0.260722	0.333179	0.00117034	0.00357986
t(8;21)	cg13443627	TACSTD2	0.311211	0.499038	0.144	0.5155	0.261698	0.286228	0.00345498	0.00873828
t(8;21)	cg26134895	FBXL7	0.447632	0.253812	0.554	0.0905	0.312864	0.277161	0.00558407	0.0132469
t(8;21)	cg19868631	VSTM2A	0.489421	0.290263	0.492	0.175	0.34845	0.28888	0.00592991	0.0138899
t(8;21)	cg25092681	MARCH11	0.439	0.300738	0.354	0.1175	0.299237	0.320753	0.00820818	0.0182093
t(8;21)	cg15564444	IGSF21	0.687895	0.55525	0.804	0.5335	0.231459	0.220272	0.00862562	0.0189418
t(8;21)	cg01791874	MARCH11	0.620895	0.423163	0.694	0.3275	0.286628	0.347215	0.00960643	0.0208495
t(8;21)	cg00339556	MARCH11	0.625895	0.416537	0.702	0.335	0.284525	0.351042	0.0108117	0.0227804
t(8;21)	cg16620382	TTBK1	0.635053	0.427637	0.747	0.237	0.313028	0.354832	0.0134664	0.0272288
t(8;21)	cg21811204	SHROOM1	0.354368	0.489837	0.257	0.435	0.273469	0.274993	0.0183961	0.0355348
t(8;21)	cg04107099	ELOVL4	0.424737	0.3055	0.498	0.1735	0.262279	0.248022	0.0218261	0.0408257
t(8;21)	cg16150752	MARCH11	0.714053	0.508938	0.795	0.575	0.232071	0.357054	0.0225527	0.0418836
t(8;21)	cg17712694	MARCH11	0.701421	0.510962	0.794	0.5495	0.229797	0.34863	0.0260995	0.0473873
t(8;21)	cg15448220	SETDB1	0.777895	0.642587	0.735	0.7045	0.173702	0.289518	0.0266403	0.0482405
t(15;17)	cg16167741	NFYC	0.892	0.337379	0.8955	0.138	0.0289482	0.319488	0.00145632	0.0210095
t(15;17)	cg23657099	C7orf50	0.93825	0.163168	0.9385	0.103	0.0101119	0.153563	0.000378903	0.0210095
t(15;17)	cg00776960	IGDCC4	0.7425	0.332032	0.734	0.23	0.119915	0.217357	0.00145715	0.0210095
t(15;17)	cg02409722	SETD7	0.93725	0.687263	0.939	0.76	0.0112361	0.235247	0.000907994	0.0210095
t(15;17)	cg23553912	SCHIP1	0.8635	0.513179	0.906	0.519	0.11714	0.314718	0.00692259	0.0365828
t(15;17)	cg02796568	SYNE1	0.497	0.793211	0.499	0.9	0.225687	0.193896	0.00727127	0.0373717
t(15;17)	cg02300154	WBSCR17	0.74225	0.277495	0.7095	0.064	0.1737	0.316659	0.00837674	0.0396614
t(15;17)	cg08854834	C21orf7	0.2235	0.555884	0.224	0.595	0.129374	0.274646	0.00972305	0.0429931

## Sheet: S6
Subtype	CpG ID	Gene	Mean B-value relapse	Mean B-value no relapse	Median B-value relapse	Median B-value no relapse	Std B-value relapse	Std B-value no relapse	p-value
t(8;21)	cg12864721	C10orf41	0.13475	0.657667	0.0725	0.757	0.149138	0.296369	0.00084242
t(8;21)	cg19108881	CASR	0.456667	0.881333	0.3705	0.912	0.26486	0.0810794	0.00214112
t(8;21)	cg17242351	ACTC1	0.639833	0.904833	0.655	0.9075	0.242808	0.0437786	0.00328884
t(8;21)	cg18847227	SUMF1	0.569917	0.189	0.526	0.1415	0.25756	0.154879	0.00380082
t(8;21)	cg19659642	CD9	0.788	0.915833	0.8335	0.913	0.130124	0.0216833	0.00434781
t(8;21)	cg02872426	DDO	0.3455	0.763167	0.262	0.897	0.26509	0.265096	0.00500316
t(8;21)	cg11639950	NCOR2	0.401917	0.635	0.425	0.682	0.0916758	0.146772	0.00650978
t(8;21)	cg14687145	FAM179A	0.07025	0.206	0.0605	0.2205	0.0292112	0.120278	0.00843504
t(8;21)	cg10622644	VPS13D	0.42125	0.705833	0.3735	0.6635	0.160051	0.165613	0.0084634
t(8;21)	cg12092090	CACNA1A	0.3125	0.703667	0.1415	0.7	0.293516	0.167291	0.0084634
t(8;21)	cg12474798	ADO	0.57725	0.867667	0.5885	0.848	0.253773	0.0530572	0.0084634
t(8;21)	cg13221899	C13orf27	0.3215	0.617333	0.3125	0.615	0.215123	0.132021	0.0084634
t(8;21)	cg13330559	SHISA6	0.312833	0.665	0.178	0.7725	0.290144	0.312402	0.0084634
t(8;21)	cg22381248	HIVEP3	0.5655	0.811833	0.5955	0.8485	0.236653	0.0929632	0.0084634
t(8;21)	cg24573743	ANKRD53	0.04075	0.081	0.04	0.059	0.0103671	0.0531902	0.00951105
t(8;21)	cg00955911	FOXA1	0.295167	0.583667	0.2315	0.578	0.218517	0.167024	0.00957306
t(8;21)	cg07813142	SP5	0.375667	0.741	0.2845	0.877	0.314842	0.33488	0.010877
t(8;21)	cg09368188	KIF26B	0.687417	0.859333	0.7885	0.8695	0.240907	0.0546358	0.010877
t(8;21)	cg13184736	GNG12	0.67025	0.915667	0.772	0.9295	0.262919	0.0407856	0.010877
t(8;21)	cg16150752	MARCH11	0.61125	0.878667	0.596	0.903	0.231774	0.0756457	0.010877
t(8;21)	cg25092681	MARCH12	0.304375	0.646167	0.20075	0.7715	0.236774	0.260033	0.010877
t(8;21)	cg26134895	FBXL7	0.325667	0.66	0.2135	0.783	0.267498	0.312997	0.010877
t(8;21)	cg27104822	AP1M2	0.342417	0.687833	0.247	0.7145	0.263353	0.207871	0.010877
t(8;21)	cg07882671	IRX4	0.205667	0.660167	0.037	0.78	0.248228	0.317725	0.0138287
t(8;21)	cg00339556	MARCH11	0.5125	0.799667	0.6015	0.8405	0.295226	0.111146	0.0138688
t(8;21)	cg03731458	CUGBP2	0.215833	0.422833	0.1905	0.362	0.111726	0.246943	0.0138688
t(8;21)	cg09576143	HTRA1	0.460958	0.734167	0.5245	0.8455	0.318311	0.312818	0.0138688
t(8;21)	cg17842918	ATP11A	0.511583	0.829167	0.553	0.8855	0.260797	0.135102	0.0138688
t(8;21)	cg19019537	C8orf42	0.268417	0.745667	0.143	0.8765	0.242395	0.34974	0.0138688
t(8;21)	cg19743891	CD52;UBXN11	0.27825	0.585833	0.2375	0.628	0.194122	0.281965	0.0138688
t(8;21)	cg23597015	CORO2B	0.6045	0.835167	0.7175	0.8785	0.290526	0.12257	0.0138688
t(8;21)	cg13622546	ASB6	0.430417	0.697167	0.373	0.684	0.234519	0.178526	0.0174979
t(8;21)	cg22286382	SLC17A3	0.09725	0.233833	0.0775	0.242	0.0487594	0.131975	0.0174979
t(8;21)	cg04641860	HNRNPF	0.135083	0.257833	0.1335	0.217	0.0397114	0.213467	0.017545
normal	cg09576143	HTRA1	0.4025	0.145577	0.2475	0.07	0.304747	0.199698	0.000802697
normal	cg21811204	SHROOM1	0.615308	0.318692	0.592	0.269	0.194595	0.236385	0.000879387
normal	cg16340422	PLD6	0.823308	0.508769	0.915	0.544	0.176485	0.326674	0.0018752
normal	cg26059153	MACROD2	0.431385	0.151846	0.502	0.03	0.279072	0.234426	0.00278907
normal	cg19093370	PLD6	0.883077	0.633538	0.958	0.736	0.145614	0.302461	0.0030299
normal	cg12806681	AHRR	0.792538	0.575846	0.893	0.56	0.231439	0.2293	0.00327979
normal	cg21368161	TMEM184A	0.336308	0.147692	0.328	0.068	0.206867	0.168422	0.0032844
normal	cg24578857	PLD6	0.888461	0.622692	0.962	0.732	0.137639	0.304174	0.00382
normal	cg23553912	SCHIP1	0.675	0.379769	0.699	0.459	0.257803	0.290934	0.00382519
normal	cg24702147	MIR141;MIR200C	0.967692	0.893231	0.971	0.954	0.00672538	0.180097	0.00505523
normal	cg10568066	RNF39	0.731615	0.454923	0.812	0.562	0.306046	0.332811	0.00517215
normal	cg19341652	DSE;TSPYL1	0.784923	0.556923	0.829	0.519	0.162551	0.232625	0.00555325
normal	cg13287964	LOC100130522	0.464923	0.241308	0.574	0.083	0.232993	0.248666	0.00556015
normal	cg12092090	CACNA1A	0.217846	0.0837692	0.121	0.065	0.223057	0.0336679	0.00598122
normal	cg20415053	CATSPER4	0.722231	0.425231	0.948	0.335	0.312594	0.345424	0.00598122
normal	cg04624110	MACROD2	0.716077	0.449308	0.771	0.459	0.239474	0.286502	0.00598851
normal	cg23773946	TNFRSF6B	0.236615	0.138615	0.067	0.048	0.267137	0.224264	0.00641496
normal	cg08022717	CYP27C1	0.652154	0.398308	0.618	0.445	0.196487	0.245481	0.00690902
normal	cg08564661	PLEKHA1	0.729231	0.434308	0.86	0.378	0.256344	0.33458	0.00691713
normal	cg12694372	TNXB	0.666308	0.392308	0.764	0.407	0.268472	0.288276	0.00797066
normal	cg13401893	RNF39	0.698385	0.423231	0.761	0.505	0.311817	0.327907	0.00913291
normal	cg12061113	LOC100130522	0.439615	0.221769	0.579	0.06	0.254031	0.234281	0.00914286
normal	cg02409722	SETD7	0.605462	0.793385	0.713	0.855	0.25254	0.201723	0.00916276
normal	cg12444411	GNA12	0.586077	0.325538	0.559	0.256	0.309022	0.290148	0.00916276
normal	cg20211463	SLCO5A1	0.68	0.366385	0.751	0.266	0.248853	0.327243	0.00916276
normal	cg21103992	MICAL3	0.314462	0.621538	0.202	0.628	0.2817	0.294266	0.00916276
normal	cg02940147	ROBO3	0.926308	0.820308	0.94	0.877	0.0377014	0.197856	0.00978397
normal	cg06744585	NFIX	0.909539	0.776462	0.967	0.906	0.188636	0.218943	0.00980487
normal	cg26758986	P4HA3	0.678385	0.420769	0.833	0.268	0.260281	0.288929	0.0105081
normal	cg15230883	DCP1A	0.420615	0.692769	0.349	0.795	0.340497	0.287823	0.0105081
normal	cg05194726	NRIP2	0.657462	0.408538	0.646	0.224	0.242752	0.302652	0.0120104
normal	cg22324029	HLA-DMB	0.208385	0.435385	0.096	0.284	0.243968	0.340433	0.0120104
normal	cg00400183	C19orf76;CPT1C	0.569154	0.307615	0.639	0.237	0.267095	0.280465	0.0120225
normal	cg03583857	CD34	0.373231	0.667231	0.268	0.803	0.236593	0.306091	0.0120225
normal	cg15564619	SKI	0.785615	0.530154	0.886	0.525	0.193152	0.328882	0.0120225
normal	cg16620382	TTBK1	0.521385	0.236	0.597	0.107	0.375241	0.295091	0.0120225
normal	cg23998903	C2orf80	0.786615	0.750231	0.861	0.807	0.219848	0.120581	0.0128229
normal	cg27300804	LAMP1	0.870692	0.757846	0.94	0.879	0.153176	0.237339	0.0136829
normal	cg03277819	NINJ2	0.664538	0.416539	0.738	0.408	0.253691	0.24748	0.0137093
normal	cg12887033	RPH3AL	0.493846	0.29	0.547	0.129	0.185276	0.281365	0.0137225
MLL rearranged	cg07790615	RYR2	0.16625	0.499636	0.0765	0.466	0.22104	0.260721	0.00219461
MLL rearranged	cg01330448	LAMP1	0.96675	0.962091	0.9655	0.963	0.00341216	0.00311303	0.00265968
MLL rearranged	cg25670583	PCGF3	0.9295	0.910545	0.9295	0.913	0.0101559	0.0147537	0.00275221
MLL rearranged	cg12806681	AHRR	0.92875	0.862636	0.931	0.912	0.00898809	0.117872	0.00281488
MLL rearranged	cg17760049	FOXK1	0.9615	0.871727	0.962	0.922	0.00918073	0.124761	0.00281488
MLL rearranged	cg25513659	RPH3AL	0.372875	0.133364	0.301	0.111	0.24216	0.08408	0.00282539
MLL rearranged	cg04248271	EBF1	0.08675	0.494545	0.083	0.522	0.0312536	0.251233	0.00464726
MLL rearranged	cg18285788	PTPRN2	0.080875	0.0345455	0.0575	0.031	0.0514821	0.0103862	0.00518688
MLL rearranged	cg04797323	SOCS2	0.097125	0.201636	0.0405	0.107	0.16386	0.184199	0.00520373
MLL rearranged	cg08906309	LOC100128288	0.76225	0.856273	0.772	0.868	0.0978406	0.0478228	0.00827174
MLL rearranged	cg17353893	CLIP2	0.97625	0.973364	0.977	0.974	0.00198206	0.00273031	0.0087676
MLL rearranged	cg01064265	IRX6	0.034375	0.0842727	0.0255	0.04	0.0190558	0.0926165	0.00925196
MLL rearranged	cg16620382	TTBK1	0.175375	0.518273	0.0925	0.502	0.177062	0.360713	0.00930356
MLL rearranged	cg21287054	TTYH1	0.46875	0.218182	0.486	0.158	0.253833	0.17241	0.00930356
MLL rearranged	cg23736843	RASAL1	0.047875	0.0746364	0.034	0.04	0.042161	0.0796458	0.0112215
MLL rearranged	cg04343891	PRDM8	0.049625	0.0589091	0.047	0.06	0.00768928	0.00839589	0.011371
MLL rearranged	cg14391907	ATP6V1G1	0.81875	0.638727	0.856	0.667	0.0991647	0.195921	0.0115513
MLL rearranged	cg19019537	C8orf42	0.229875	0.513182	0.159	0.55	0.265714	0.24958	0.0115513
MLL rearranged	cg01562813	NUP210	0.66125	0.344182	0.763	0.257	0.25112	0.254743	0.0115814
MLL rearranged	cg03337482	PRDM16	0.312	0.628818	0.244	0.696	0.18765	0.272173	0.0115814
MLL rearranged	cg09935388	GFI1	0.54175	0.857364	0.6375	0.92	0.297036	0.153619	0.0127946
MLL rearranged	cg23732024	LY96	0.663	0.416	0.6575	0.481	0.243968	0.215072	0.0139807
MLL rearranged	cg16108059	TSHR	0.159125	0.058	0.149	0.05	0.111342	0.0221359	0.0141544
MLL rearranged	cg05047401	SEMA4A	0.454	0.221818	0.379	0.03	0.244124	0.309818	0.0142938
MLL rearranged	cg26299084	PRDM8	0.5145	0.230091	0.4445	0.16	0.30524	0.247234	0.0143288
MLL rearranged	cg25204852	DCC	0.442875	0.676	0.536	0.664	0.222928	0.188893	0.0143288
MLL rearranged	cg23049458	L1TD1	0.08025	0.319182	0.057	0.25	0.0621835	0.293264	0.0143288
MLL rearranged	cg22698744	RUNX1	0.49025	0.289455	0.368	0.222	0.248109	0.176741	0.0143288
MLL rearranged	cg18313416	NUP210	0.53725	0.292091	0.564	0.221	0.234172	0.196836	0.0143288
MLL rearranged	cg15139588	ZNF793	0.26625	0.530909	0.212	0.608	0.254987	0.317493	0.0143288
MLL rearranged	cg12342675	BICC1	0.444875	0.701545	0.522	0.68	0.241711	0.199582	0.0143288
MLL rearranged	cg09488203	GPR120	0.204125	0.459364	0.1565	0.488	0.11785	0.267085	0.0143288
MLL rearranged	cg12850832	EMILIN1;KHK	0.025375	0.0285455	0.026	0.028	0.00176777	0.00332757	0.0163879
MLL rearranged	cg14050824	EHMT1	0.9755	0.884727	0.975	0.968	0.00185163	0.192452	0.0169808
MLL rearranged	cg21550580	MAGI1	0.33325	0.539364	0.3205	0.491	0.202311	0.212326	0.0175797
MLL rearranged	cg25279778	GJB3	0.7195	0.436818	0.7835	0.391	0.286732	0.26102	0.0176199
MLL rearranged	cg08576643	FAM65B	0.042	0.0460909	0.0405	0.046	0.00492805	0.00284445	0.0190239
